# Supplementary material
Source: Frontiers journal article supplement (https://www.frontiersin.org/articles/112420)
Supplement: Image_1.PDF [file Image_1.PDF]

## Supplementary Figure

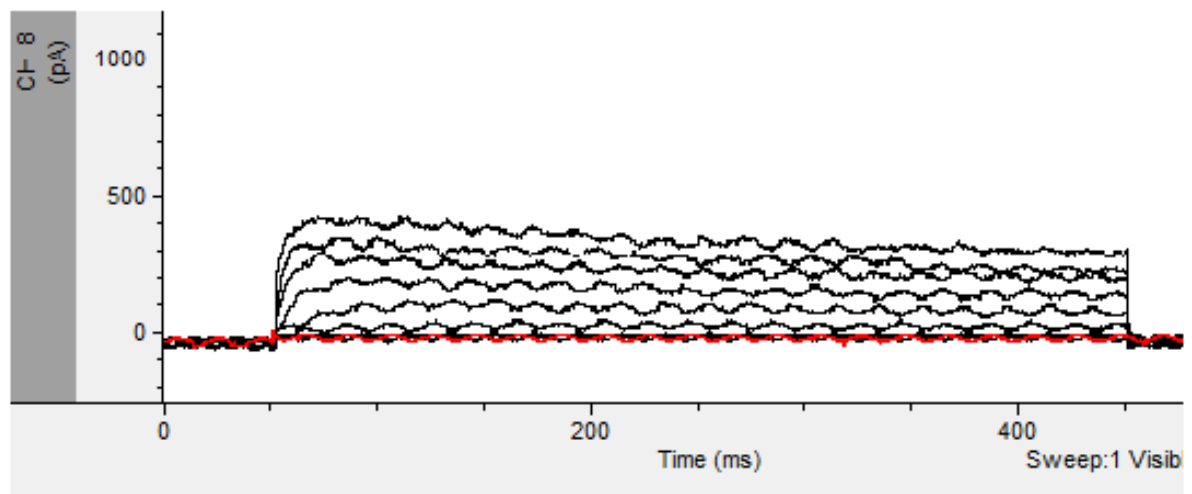

**Figure S1**

GFP-transfected current. It was recorded from HEK 293 cells that were transfected with the reporter gene GFP without the Kv subunits.
